# Supplementary material
Source: PubMed Central journal article supplement (PMC3753891)
Supplement: supp_0022155413497586_10.1369_0022155413497586_suppl.pdf [file supp_0022155413497586_10.1369_0022155413497586_suppl.pdf]

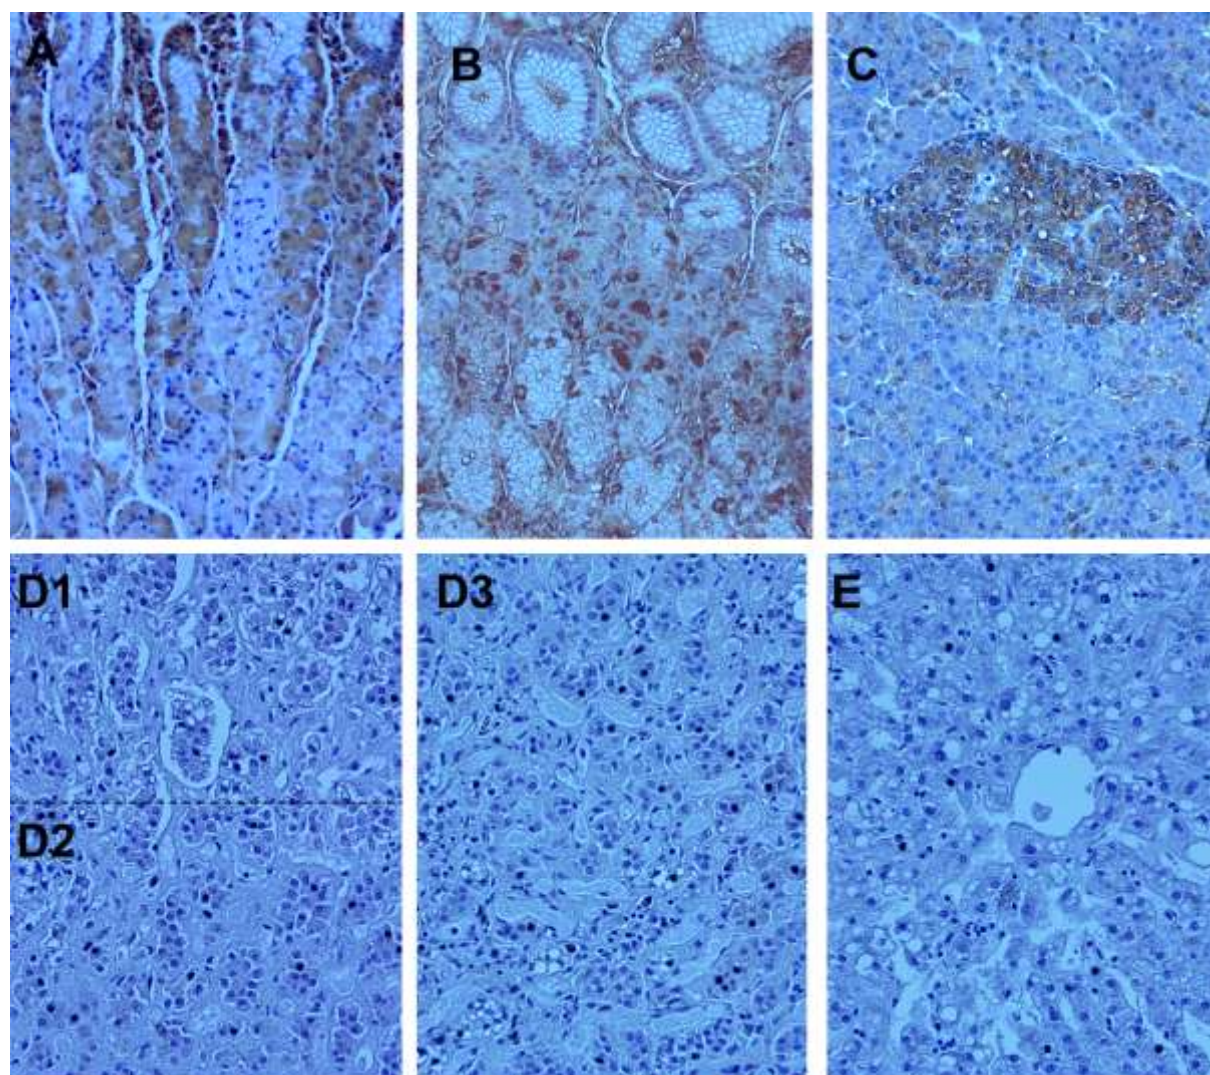

Supplement 1 Immunoreactivities of GLP-1R antibodies (MAB 28141, clone 419208, R&D Systems) in various normal human tissues. A,B,C – GLP-1R positive (brown stained cells) tissue controls (magnification x200) D1,D2,D3,E - GLP-1R negative tissue controls (magnification x200). A - Gastric mucosa from stomach body demonstrates GLP-1R immunostained cells predominantly in the neck area of principal glands; B - antral gastric

mucosa demonstrates GLP-1R positive cells scattered in pyloric glands; C –GLP-1R immunostaining of beta-cells in pancreatic islet; D1,D2 D3 – adrenal gland: no GLP-1R cellular immunostaining is seen in zona glomerulosa (D1) , zona fasciculata (D2) of adrenal cortex and in adrenal medulla (D3); E – no GLP-1R cellular immunostaining is seen in liver lobule.
